# Supplementary material
Source: MDPI journal article supplement (https://www.mdpi.com/2071-1050/11/22/6235)

## *Supporting information*

*15 pages*

*6 Tables*

*3 Figures*

*Table S 1. Food categories and corresponding sub-categories including the proportional split for the different environmental inventory matches. Inventory matches were from ecoinvent (Weidema et al., 2013) unless otherwise specified. Proportions are based on USDA's Economic Research Service (ERS, USDA, 2012) unless otherwise specified. When the match of the food item was not direct for the database, the matched name is listed in parentheses.*

| Food groups and sub-categories           | Grouped as                             | Inventory matched                                                                                                                                               |
|------------------------------------------|----------------------------------------|-----------------------------------------------------------------------------------------------------------------------------------------------------------------|
| <b>Dairy</b>                             |                                        |                                                                                                                                                                 |
| Milks and milk drinks                    | Fluid dairy                            | Cow milk, GLO                                                                                                                                                   |
| Cream and cream substitutes              | Fluid dairy                            |                                                                                                                                                                 |
| Milk desserts, sauces, gravies           | Fluid dairy                            |                                                                                                                                                                 |
| Cheeses                                  | Cheese                                 | Cheese, from cow milk, fresh, unripened, GLO                                                                                                                    |
| <b>Meats</b>                             |                                        |                                                                                                                                                                 |
| Beef                                     | Beef                                   | beef cattle, for slaughter, at beef farm/IE Economic (Blonk, 2014)                                                                                              |
| Pork                                     | Pork                                   | Pigs to slaughter, pig fattening, at farm/adapted US, Economic (Blonk, 2014)                                                                                    |
| Poultry                                  | Chicken                                | Broilers, for slaughter, at farm US, Economic (Blonk, 2014)                                                                                                     |
| Fish and shellfish                       | Fish                                   | 50% Fish and seafood, high value species, wildcaught, per kg edible, RER (Blonk, 2014)<br>50% Large trout, 2-4 kg, conventional, at farm gate, FR (Blonk, 2014) |
| Meat, type not specified                 | Meat mixture                           | 25.1% 'beef '<br>21.5% 'pork'<br>46.6% 'poultry'<br>6.8% 'fish'<br>(NMFS, NOAA, 2012; NOAA, 2014; USDA, 2015)                                                   |
| Lamb, veal, game, other carcass meat     | Meat mixture                           |                                                                                                                                                                 |
| Organ, sausages, lunchmeats, spreads     | Meat mixture                           |                                                                                                                                                                 |
| Meat, poultry, fish with nonmeat items   | Mixture of meat and vegetables         | 50% see 'meat, type not specified'<br>50% see 'vegetable mixture'                                                                                               |
| Vegetables with meat, poultry, fish      | Mixture of meat and vegetables         |                                                                                                                                                                 |
| Frozen, shelf-stable plate meals, w/meat | Mixture of meat, vegetables and grains | 33.3% see 'meat, type not specified' (see above)<br>33.3% see 'vegetable' (see below)<br>33.3% see 'grain' (see below)                                          |
| <b>Vegetables</b>                        |                                        |                                                                                                                                                                 |
| White potatoes, Puerto Rican starch veg. | Starchy vegetables                     | Potato, US                                                                                                                                                      |

| Food groups and sub-categories                   | Grouped as               | Inventory matched                                                                                                                                                                                                                                                                                                                                                                                                  |
|--------------------------------------------------|--------------------------|--------------------------------------------------------------------------------------------------------------------------------------------------------------------------------------------------------------------------------------------------------------------------------------------------------------------------------------------------------------------------------------------------------------------|
| Dark-green vegetables                            | Dark green vegetables    | Spinach, GLO                                                                                                                                                                                                                                                                                                                                                                                                       |
| Deep-yellow vegetables                           | orange/yellow vegetables | Carrot, GLO                                                                                                                                                                                                                                                                                                                                                                                                        |
| Tomatoes and tomato mixtures                     | Vegetable mixture        | 4% cauliflower, white, GLO (cruciferous vegetables)<br>3% broccoli, GLO<br>2% barrots, GLO<br>1% celery, GLO<br>5% maize grain, US<br>1% cucumber, GLO<br>5% spinach, GLO (leafy vegetables)<br>4% lettuce, GLO<br>3% onions, GLO<br>2% protein peas, GLO (peas)<br>2% green bell pepper, GLO (peppers)<br>23% sugar beet, CH (root vegetables)<br>22% potato, US<br>1% zucchini (string beans)<br>22% tomato, GLO |
| Other vegetables                                 | Vegetable mixture        |                                                                                                                                                                                                                                                                                                                                                                                                                    |
| Mixtures mostly vegetables w/o meat              | Vegetable mixture        |                                                                                                                                                                                                                                                                                                                                                                                                                    |
|                                                  |                          |                                                                                                                                                                                                                                                                                                                                                                                                                    |
|                                                  |                          |                                                                                                                                                                                                                                                                                                                                                                                                                    |
| Eggs                                             |                          |                                                                                                                                                                                                                                                                                                                                                                                                                    |
| Eggs                                             | Eggs                     | Consumption eggs, laying hens > 17 weeks, at farm (Blonk, 2014)                                                                                                                                                                                                                                                                                                                                                    |
| Egg mixtures                                     | Eggs                     |                                                                                                                                                                                                                                                                                                                                                                                                                    |
| Egg substitutes                                  | Eggs                     |                                                                                                                                                                                                                                                                                                                                                                                                                    |
| Legumes, Nuts, and Seeds                         |                          |                                                                                                                                                                                                                                                                                                                                                                                                                    |
| Legumes                                          | Legumes                  | Fava bean, integrated production, GLO                                                                                                                                                                                                                                                                                                                                                                              |
| Nuts, nut butters, and nut mixtures (with carob) | Nuts                     | Almond kernels, at huller and sheller (AU LCI, n.d.)                                                                                                                                                                                                                                                                                                                                                               |
| Seeds and seed mixtures                          | Nuts                     |                                                                                                                                                                                                                                                                                                                                                                                                                    |
| Grains                                           |                          |                                                                                                                                                                                                                                                                                                                                                                                                                    |
| Yeast breads, rolls                              | Grains                   | 74% flour, wheat, from dry milling, at plant<br>11% maize flour, from dry milling, at plant<br>11% rice, US<br>4% oat grain, dried, at farm<br><br>Percentages based on USDA’s Economic Research Service (USDA 2015h, 2015i).                                                                                                                                                                                      |
| Crackers and salty snacks from grain             | Grains                   |                                                                                                                                                                                                                                                                                                                                                                                                                    |
| Pasta, cooked cereals, rice                      | Grains                   |                                                                                                                                                                                                                                                                                                                                                                                                                    |
| Pasta, cooked cereals, rice                      | Grains                   |                                                                                                                                                                                                                                                                                                                                                                                                                    |
| Pasta, cooked cereals, rice                      | Grains                   |                                                                                                                                                                                                                                                                                                                                                                                                                    |
| Cereals, not cooked or NS as to cooked           | Grains                   |                                                                                                                                                                                                                                                                                                                                                                                                                    |

| Food groups and sub-categories           | Grouped as    | Inventory matched                                                                                                                                                                                             |
|------------------------------------------|---------------|---------------------------------------------------------------------------------------------------------------------------------------------------------------------------------------------------------------|
| Grain mixtures, frozen plate meals, soup | Grains        |                                                                                                                                                                                                               |
| Quick breads                             | Cakes         | 33.3% wheat flour, from dry milling, at plant<br>33.3% butter, from cow milk<br>33.3% sugar, from sugar beet                                                                                                  |
| Cakes, cookies, pies, pastries           | Cakes         |                                                                                                                                                                                                               |
| Pancakes, waffles, French toast, other   | Cakes         |                                                                                                                                                                                                               |
| Fruits                                   |               |                                                                                                                                                                                                               |
| Citrus fruits, juices                    | Fruit mixture | 17% Apples, GLO                                                                                                                                                                                               |
| Dried fruits                             | Fruit mixture | 8% bananas, GLO                                                                                                                                                                                               |
| Other fruits                             | Fruit mixture | 3% strawberries, GLO                                                                                                                                                                                          |
| Fruit juices and nectars excl. citrus    | Fruit mixture | 7% grape, GLO<br>8% melon, GLO<br>49% citrus, GLO<br>3% peaches, GLO (stone fruit)<br>5% pineapple, GLO (tropical fruit)                                                                                      |
| Fats, Oils, and Salad Dressings          |               |                                                                                                                                                                                                               |
| Fats                                     | Fats and oils | 3% Tallow, unrefined (animal fats)                                                                                                                                                                            |
| Oils                                     |               | 20% Vegetable oil, refined (margarine)                                                                                                                                                                        |
| Salad dressings                          |               | 51% as 33.3% “cottonseed oil, 33.3% soybean oil, 33.3% rape oil (cooking oil)<br>20% as 50% soybean oil 50% palm oil (shortening)<br>6% Refined coconut oil, at plant (other oils)                            |
| Sugars and Sweets                        |               |                                                                                                                                                                                                               |
| Sugars and sweets                        | Sugar         | 30% Sugar, from beet<br>22% Sugar, from cane<br>35% Glucose syrup (High fructose corn syrup)<br>9% Glucose syrup<br>2% Glucose syrup (Dextrose)<br>1% Glucose syrup (Edible Syrup)<br><i>Honey is omitted</i> |

*Table S 2. Percentage of food waste at retail and consumer levels for various food groups, adapted from Buzby et al., 2014.*

| Food group                                           | Retail (%) | Consumer (%) | Total waste (%) |
|------------------------------------------------------|------------|--------------|-----------------|
| Grains (and grain products)                          | 12         | 19           | 28.7            |
| Fruit                                                | 9          | 19           | 26.3            |
| Vegetables                                           | 8          | 22           | 28.2            |
| Fluid milk                                           | 12         | 20           | 29.6            |
| Other dairy                                          | 10         | 19           | 27.1            |
| Red meat, pork, other non-fish and non-poultry meats | 4          | 23           | 26.1            |
| Poultry                                              | 4          | 18           | 21.3            |
| Fish and seafood                                     | 8          | 31           | 36.5            |
| Eggs                                                 | 7          | 21           | 26.5            |
| Nuts, legumes                                        | 6          | 9            | 14.5            |
| Sugars, sweeteners                                   | 11         | 30           | 37.7            |
| Fats, oils                                           | 21         | 17           | 34.4            |

*Table S 3. Assumptions used to account for food preparation and clean-up. The same assumptions were used for all meals, scaled to the meal weight.*

| Activity                   | Parameter                           | Expert assumption                                             |
|----------------------------|-------------------------------------|---------------------------------------------------------------|
| Thawing of frozen products | Device used                         | 1.1 kWh (max) microwave                                       |
|                            | Life time of microwave              | 8 years                                                       |
|                            | Thawing time                        | 1 min (50% power)                                             |
|                            | Energy use                          | 0.15 kWh/kg                                                   |
|                            | Frequency of use                    | 5 times/week                                                  |
| Cooking on skillet         | Skillet weight                      | 2.2 kg                                                        |
|                            | Life time                           | 8 years                                                       |
|                            | Cooking time                        | 0.13 hour                                                     |
|                            | Energy use                          | 2.1 kWh/kg                                                    |
|                            | Times skillet used                  | 500 times                                                     |
| Oven cooking               | Skillet weight                      | 2.2 kg                                                        |
|                            | Cooking time                        | 0.3 hour                                                      |
|                            | Cooking temperature                 | 180 °C                                                        |
|                            | Energy use                          | 12 kWh/kg                                                     |
|                            | Servings cooked in lifetime of oven | 146,000                                                       |
| Dish washing               | Washing method                      | Residential dishwasher                                        |
|                            | Usage rate                          | Each serving occupies 1/10 <sup>th</sup> of a dishwasher load |

*Table S 4. Average Consumption weight (grams) of meals and the production weight required for the environmental impact assessment, which has been weight-adjusted and waste-adjusted for meatless and meat-containing meals (based on NHANES 2011-12, USDA 2015b, Buzby et al. 2014).*

[illegible]

|                                                  | Meat-containing meals         |           |            |                                                                                      |           |            | Meatless meals       |           |            |                                             |           |            |                                                                                      |           |            |
|--------------------------------------------------|-------------------------------|-----------|------------|--------------------------------------------------------------------------------------|-----------|------------|----------------------|-----------|------------|---------------------------------------------|-----------|------------|--------------------------------------------------------------------------------------|-----------|------------|
|                                                  | Consumption quantity (NHANES) |           |            | Produced quantity (consumption quantity adjusted for waste and cooking losses/gains) |           |            | Consumption quantity |           |            | Scaled to equal meat-containing meal weight |           |            | Produced quantity (consumption quantity adjusted for waste and cooking losses/gains) |           |            |
| Food sub-categories                              | Breakfast (g)                 | Lunch (g) | Dinner (g) | Breakfast (g)                                                                        | Lunch (g) | Dinner (g) | Breakfast (g)        | Lunch (g) | Dinner (g) | Breakfast (g)                               | Lunch (g) | Dinner (g) | Breakfast (g)                                                                        | Lunch (g) | Dinner (g) |
| Vegetables with meat, poultry, fish              | 0.00                          | 0.95      | 0.35       | 0.00                                                                                 | 1.36      | 0.50       | 0.00                 | 0.00      | 0.00       | 0.00                                        | 0.00      | 0.00       | 0.00                                                                                 | 0.00      | 0.00       |
| Eggs                                             | 13.56                         | 1.43      | 1.00       | 18.83                                                                                | 1.98      | 1.39       | 3.95                 | 2.29      | 1.63       | 5.34                                        | 2.76      | 1.87       | 7.41                                                                                 | 3.84      | 2.60       |
| Egg mixtures                                     | 29.57                         | 2.38      | 1.62       | 41.07                                                                                | 3.31      | 2.24       | 11.65                | 7.94      | 5.81       | 15.75                                       | 9.58      | 6.67       | 21.88                                                                                | 13.31     | 9.27       |
| Egg substitutes                                  | 0.45                          | 0.10      | 0.00       | 0.63                                                                                 | 0.14      | 0.00       | 0.19                 | 0.07      | 0.00       | 0.25                                        | 0.08      | 0.00       | 0.35                                                                                 | 0.11      | 0.00       |
| Legumes*                                         | 4.29                          | 8.49      | 12.32      | 1.83                                                                                 | 3.62      | 5.25       | 1.75                 | 15.88     | 19.40      | 2.36                                        | 19.17     | 22.28      | 1.01                                                                                 | 8.16      | 9.49       |
| Nuts, nut butters, and nut mixtures (with carob) | 0.31                          | 0.95      | 0.63       | 0.36                                                                                 | 1.12      | 0.74       | 1.83                 | 3.11      | 1.71       | 2.47                                        | 3.75      | 1.97       | 2.91                                                                                 | 4.42      | 2.32       |
| Seeds and seed mixtures                          | 0.06                          | 0.04      | 0.10       | 0.07                                                                                 | 0.05      | 0.12       | 0.09                 | 0.07      | 0.14       | 0.12                                        | 0.09      | 0.16       | 0.14                                                                                 | 0.10      | 0.19       |
| Yeast breads, rolls                              | 25.19                         | 22.65     | 16.34      | 36.51                                                                                | 32.83     | 23.68      | 16.42                | 13.56     | 12.60      | 22.20                                       | 16.37     | 14.47      | 32.17                                                                                | 23.72     | 20.97      |
| Quick breads                                     | 8.54                          | 4.00      | 7.29       | 12.37                                                                                | 5.79      | 10.56      | 2.97                 | 2.82      | 4.16       | 4.01                                        | 3.40      | 4.78       | 5.81                                                                                 | 4.93      | 6.93       |
| Cakes, cookies, pies, pastries                   | 3.91                          | 7.16      | 9.26       | 5.66                                                                                 | 10.38     | 13.42      | 6.63                 | 6.01      | 6.30       | 8.97                                        | 7.25      | 7.23       | 13.00                                                                                | 10.51     | 10.48      |
| Crackers and salty snacks from grain             | 0.27                          | 2.08      | 1.67       | 0.39                                                                                 | 3.01      | 2.43       | 0.77                 | 3.84      | 3.06       | 1.04                                        | 4.63      | 3.52       | 1.51                                                                                 | 6.71      | 5.10       |
| Pancakes, waffles, French toast, other           | 9.30                          | 0.78      | 0.57       | 13.48                                                                                | 1.13      | 0.83       | 3.78                 | 1.26      | 1.11       | 5.11                                        | 1.52      | 1.27       | 7.41                                                                                 | 2.20      | 1.84       |
| Pasta, cooked cereals, rice*                     | 30.64                         | 24.03     | 30.30      | 18.91                                                                                | 14.83     | 18.70      | 26.68                | 14.17     | 17.01      | 36.06                                       | 17.10     | 19.53      | 22.26                                                                                | 10.56     | 12.05      |
| Cereals, not cooked or not specified*            | 1.09                          | 0.06      | 0.14       | 0.56                                                                                 | 0.03      | 0.07       | 11.40                | 1.83      | 1.82       | 15.41                                       | 2.21      | 2.09       | 7.95                                                                                 | 1.14      | 1.08       |



|                                          | Meat-containing meals         |           |            |                                                                                      |           |            | Meatless meals       |           |            |                                             |           |            |                                                                                      |           |            |
|------------------------------------------|-------------------------------|-----------|------------|--------------------------------------------------------------------------------------|-----------|------------|----------------------|-----------|------------|---------------------------------------------|-----------|------------|--------------------------------------------------------------------------------------|-----------|------------|
|                                          | Consumption quantity (NHANES) |           |            | Produced quantity (consumption quantity adjusted for waste and cooking losses/gains) |           |            | Consumption quantity |           |            | Scaled to equal meat-containing meal weight |           |            | Produced quantity (consumption quantity adjusted for waste and cooking losses/gains) |           |            |
| Food sub-categories                      | Breakfast (g)                 | Lunch (g) | Dinner (g) | Breakfast (g)                                                                        | Lunch (g) | Dinner (g) | Breakfast (g)        | Lunch (g) | Dinner (g) | Breakfast (g)                               | Lunch (g) | Dinner (g) | Breakfast (g)                                                                        | Lunch (g) | Dinner (g) |
| Grain mixtures, frozen plate meals, soup | 9.60                          | 35.29     | 43.99      | 13.91                                                                                | 51.14     | 63.75      | 14.43                | 125.40    | 194.72     | 19.51                                       | 151.33    | 223.62     | 28.27                                                                                | 219.32    | 324.09     |
| Meat substitutes, mainly cereal protein  | 0.00                          | 0.00      | 0.00       | 0.00                                                                                 | 0.00      | 0.00       | 0.02                 | 0.04      | 0.00       | 0.03                                        | 0.05      | 0.00       | 0.04                                                                                 | 0.07      | 0.00       |
| Citrus fruits, juices                    | 36.40                         | 7.68      | 8.96       | 51.27                                                                                | 10.82     | 12.63      | 25.05                | 9.02      | 7.10       | 33.87                                       | 10.89     | 8.15       | 47.70                                                                                | 15.34     | 11.48      |
| Dried fruits*                            | 0.09                          | 0.11      | 0.09       | 0.58                                                                                 | 0.71      | 0.58       | 0.72                 | 0.21      | 0.27       | 0.97                                        | 0.25      | 0.31       | 6.08                                                                                 | 1.56      | 1.97       |
| Other fruits                             | 11.63                         | 13.65     | 11.28      | 16.37                                                                                | 19.23     | 15.89      | 22.02                | 20.64     | 20.13      | 29.76                                       | 24.91     | 23.12      | 41.92                                                                                | 35.08     | 32.56      |
| Fruit juices and nectars excl. citrus    | 8.94                          | 7.80      | 8.92       | 12.60                                                                                | 10.99     | 12.56      | 8.04                 | 10.13     | 6.80       | 10.87                                       | 12.22     | 7.81       | 15.31                                                                                | 17.21     | 11.00      |
| White potatoes, starch veg.              | 16.95                         | 23.15     | 33.51      | 24.22                                                                                | 33.07     | 47.87      | 3.15                 | 7.62      | 9.84       | 4.25                                        | 9.20      | 11.30      | 6.07                                                                                 | 13.14     | 16.15      |
| Dark-green vegetables                    | 0.49                          | 5.85      | 10.84      | 0.70                                                                                 | 8.36      | 15.49      | 0.36                 | 3.29      | 5.48       | 0.49                                        | 3.97      | 6.30       | 0.70                                                                                 | 5.67      | 9.00       |
| Deep-yellow vegetables                   | 0.17                          | 2.72      | 5.03       | 0.24                                                                                 | 3.88      | 7.19       | 0.84                 | 2.52      | 2.67       | 1.14                                        | 3.04      | 3.07       | 1.63                                                                                 | 4.34      | 4.38       |
| Tomatoes and tomato mixtures             | 6.53                          | 12.39     | 13.07      | 9.33                                                                                 | 17.70     | 18.66      | 2.35                 | 10.55     | 13.82      | 3.18                                        | 12.73     | 15.87      | 4.54                                                                                 | 18.19     | 22.67      |
| Other vegetables                         | 4.93                          | 31.68     | 46.91      | 7.04                                                                                 | 45.25     | 67.01      | 3.80                 | 29.37     | 38.21      | 5.14                                        | 35.44     | 43.88      | 7.34                                                                                 | 50.63     | 62.68      |
| Mixtures mostly vegetables w/o meat      | 0.19                          | 0.05      | 0.00       | 0.28                                                                                 | 0.07      | 0.00       | 0.48                 | 0.66      | 0.00       | 0.66                                        | 0.80      | 0.00       | 0.94                                                                                 | 1.14      | 0.00       |
| Fats                                     | 1.73                          | 0.60      | 1.28       | 2.79                                                                                 | 0.96      | 2.07       | 1.04                 | 0.58      | 0.63       | 1.41                                        | 0.69      | 0.72       | 2.27                                                                                 | 1.12      | 1.17       |
| Oils                                     | 0.00                          | 0.05      | 0.07       | 0.00                                                                                 | 0.08      | 0.12       | 0.03                 | 0.12      | 0.10       | 0.05                                        | 0.14      | 0.11       | 0.08                                                                                 | 0.22      | 0.18       |
| Salad dressings                          | 1.10                          | 4.61      | 4.75       | 1.77                                                                                 | 7.44      | 7.66       | 0.13                 | 1.67      | 1.93       | 0.18                                        | 2.02      | 2.21       | 0.28                                                                                 | 3.25      | 3.57       |
| Sugars and sweets                        | 8.94                          | 2.45      | 3.19       | 15.15                                                                                | 4.16      | 5.41       | 5.37                 | 3.49      | 4.05       | 7.26                                        | 4.21      | 4.65       | 12.30                                                                                | 7.13      | 7.88       |
| Total of all categories                  | 366                           | 412       | 496        | 491                                                                                  | 554       | 667        | 270                  | 341       | 432        | 366                                         | 412       | 496        | 487                                                                                  | 559       | 677        |

|                     | Meat-containing meals         |           |            |                                                                                      |           |            | Meatless meals       |           |            |                                             |           |            |                                                                                      |           |            |
|---------------------|-------------------------------|-----------|------------|--------------------------------------------------------------------------------------|-----------|------------|----------------------|-----------|------------|---------------------------------------------|-----------|------------|--------------------------------------------------------------------------------------|-----------|------------|
|                     | Consumption quantity (NHANES) |           |            | Produced quantity (consumption quantity adjusted for waste and cooking losses/gains) |           |            | Consumption quantity |           |            | Scaled to equal meat-containing meal weight |           |            | Produced quantity (consumption quantity adjusted for waste and cooking losses/gains) |           |            |
| Food sub-categories | Breakfast (g)                 | Lunch (g) | Dinner (g) | Breakfast (g)                                                                        | Lunch (g) | Dinner (g) | Breakfast (g)        | Lunch (g) | Dinner (g) | Breakfast (g)                               | Lunch (g) | Dinner (g) | Breakfast (g)                                                                        | Lunch (g) | Dinner (g) |

\*Consumption is based on final cooked weight, production volume based on the form of the environmental data (e.g. dry weight for legumes). A factor of 2.76 was used to adjust for wet to dry weight of beans, 2.35 for wet to dry weight of pasta, 2.81 for wet to dry weight of grains, 4.46 for dray to wet wait of fruit, based on ratios of calories for different food states (i.e. dry, fresh, cooked) from USDA's nutrient database (USDA, 2015).

Table S 5. Absolute values for environmental impact indicators of meal occasions for meatless and meat-containing meals.

| Life cycle stage                          |                     |              |             |           |              |        |                  |        |
|-------------------------------------------|---------------------|--------------|-------------|-----------|--------------|--------|------------------|--------|
| Impact category                           | Meal type           | Raw material | Manufacture | Packaging | Distribution | Use    | Waste management | Total  |
| Carbon Footprint (kg CO <sub>2</sub> -eq) | Breakfast with meat | 2.1E+0       | 1.6E-1      | 5.1E-2    | 3.3E-2       | 1.2E-1 | 8.7E-2           | 2.6E+0 |
|                                           | Meatless breakfast  | 6.2E-1       | 1.6E-1      | 5.1E-2    | 3.3E-2       | 1.2E-1 | 9.1E-2           | 1.1E+0 |
|                                           | Lunch with meat     | 3.3E+0       | 1.6E-1      | 6.7E-2    | 3.3E-2       | 1.2E-1 | 9.4E-2           | 3.8E+0 |
|                                           | Meatless lunch      | 5.0E-1       | 1.6E-1      | 6.7E-2    | 3.3E-2       | 1.2E-1 | 9.9E-2           | 9.8E-1 |
|                                           | Dinner with meat    | 4.2E+0       | 1.6E-1      | 8.4E-2    | 3.3E-2       | 1.2E-1 | 1.2E-1           | 4.8E+0 |
|                                           | Meatless dinner     | 5.7E-1       | 1.6E-1      | 8.4E-2    | 3.3E-2       | 1.2E-1 | 1.2E-1           | 1.1E+0 |
| Water Use (m <sup>3</sup> )               | Breakfast with meat | 4.1E-1       | 5.8E-4      | 2.0E-5    | 1.2E-4       | 4.7E-4 | 6.9E-5           | 4.1E-1 |
|                                           | Meatless breakfast  | 1.5E-1       | 5.8E-4      | 2.0E-5    | 1.2E-4       | 4.7E-4 | 7.2E-5           | 1.5E-1 |
|                                           | Lunch with meat     | 6.9E-1       | 5.8E-4      | 2.6E-5    | 1.2E-4       | 4.7E-4 | 7.5E-5           | 6.9E-1 |
|                                           | Meatless lunch      | 1.3E-1       | 5.8E-4      | 2.6E-5    | 1.2E-4       | 4.7E-4 | 7.9E-5           | 1.3E-1 |
|                                           | Dinner with meat    | 9.5E-1       | 5.8E-4      | 3.2E-5    | 1.2E-4       | 4.7E-4 | 9.1E-5           | 9.5E-1 |
|                                           | Meatless dinner     | 1.5E-1       | 5.8E-4      | 3.2E-5    | 1.2E-4       | 4.7E-4 | 9.6E-5           | 1.5E-1 |
| Resource Consumption (MJ)                 | Breakfast with meat | 1.3E+1       | 2.6E+0      | 1.2E+0    | 5.3E-1       | 1.9E+0 | 6.3E-2           | 1.9E+1 |
|                                           | Meatless breakfast  | 4.3E+0       | 2.6E+0      | 1.2E+0    | 5.3E-1       | 1.9E+0 | 6.6E-2           | 1.1E+1 |
|                                           | Lunch with meat     | 1.9E+1       | 2.6E+0      | 1.6E+0    | 5.3E-1       | 1.9E+0 | 6.8E-2           | 2.6E+1 |
|                                           | Meatless lunch      | 3.9E+0       | 2.6E+0      | 1.6E+0    | 5.3E-1       | 1.9E+0 | 7.2E-2           | 1.1E+1 |
|                                           | Dinner with meat    | 2.5E+1       | 2.6E+0      | 1.9E+0    | 5.3E-1       | 1.9E+0 | 8.3E-2           | 3.2E+1 |
|                                           | Meatless dinner     | 4.5E+0       | 2.6E+0      | 1.9E+0    | 5.3E-1       | 1.9E+0 | 8.7E-2           | 1.2E+1 |
| Health Impact of Pollution (DALY)         | Breakfast with meat | 2.5E-6       | 9.9E-8      | 5.0E-8    | 2.0E-8       | 8.4E-8 | 4.0E-9           | 2.7E-6 |
|                                           | Meatless breakfast  | 7.7E-7       | 9.9E-8      | 5.0E-8    | 2.0E-8       | 8.4E-8 | 4.0E-9           | 1.0E-6 |
|                                           | Lunch with meat     | 3.7E-6       | 9.9E-8      | 6.5E-8    | 2.0E-8       | 8.4E-8 | 4.0E-9           | 3.9E-6 |

|                                                 |                     |        |        |        |        |        |        |        |
|-------------------------------------------------|---------------------|--------|--------|--------|--------|--------|--------|--------|
|                                                 | Meatless lunch      | 5.8E-7 | 9.9E-8 | 6.5E-8 | 2.0E-8 | 8.4E-8 | 4.0E-9 | 8.5E-7 |
|                                                 | Dinner with meat    | 4.6E-6 | 9.9E-8 | 8.1E-8 | 2.0E-8 | 8.4E-8 | 5.0E-9 | 4.9E-6 |
|                                                 | Meatless dinner     | 6.3E-7 | 9.9E-8 | 8.1E-8 | 2.0E-8 | 8.4E-8 | 5.0E-9 | 9.2E-7 |
| <b>Ecosystem Quality (PDF-m<sup>2</sup>-yr)</b> | Breakfast with meat | 6.9E+0 | 5.2E-2 | 1.1E-2 | 1.0E-2 | 3.1E-2 | 1.0E-3 | 7.0E+0 |
|                                                 | Meatless breakfast  | 2.0E+0 | 5.2E-2 | 1.1E-2 | 1.0E-2 | 3.1E-2 | 1.0E-3 | 2.1E+0 |
|                                                 | Lunch with meat     | 1.0E+1 | 5.2E-2 | 1.4E-2 | 1.0E-2 | 3.1E-2 | 2.0E-3 | 1.1E+1 |
|                                                 | Meatless lunch      | 1.5E+0 | 5.2E-2 | 1.4E-2 | 1.0E-2 | 3.1E-2 | 2.0E-3 | 1.6E+0 |
|                                                 | Dinner with meat    | 1.3E+1 | 5.2E-2 | 1.8E-2 | 1.0E-2 | 3.1E-2 | 2.0E-3 | 1.3E+1 |
|                                                 | Meatless dinner     | 1.4E+0 | 5.2E-2 | 1.8E-2 | 1.0E-2 | 3.1E-2 | 2.0E-3 | 1.5E+0 |

Table S 6. Sensitivity analysis of the influence of various meat types.

| Meal types compared       |                    | Impact of A minus impact of B           |                             |                           |                                   |                                            |
|---------------------------|--------------------|-----------------------------------------|-----------------------------|---------------------------|-----------------------------------|--------------------------------------------|
| A                         | B                  | Carbon Footprint (kg CO <sub>2</sub> e) | Water Use (m <sup>3</sup> ) | Resource Consumption (MJ) | Health Impact of Pollution (DALY) | Ecosystem Quality (PDF*m <sup>2</sup> *yr) |
| Beef-based breakfast      | Meatless breakfast | 4.663                                   | 0.214                       | 13.88                     | 0.0628890                         | 17.14                                      |
| Pork-based breakfast      | Meatless breakfast | 0.721                                   | 0.174                       | 7.40                      | 0.0628854                         | 1.34                                       |
| Chicken-based breakfast   | Meatless breakfast | 0.347                                   | 0.086                       | 4.46                      | 0.0628852                         | 0.88                                       |
| Fish-based breakfast      | Meatless breakfast | 0.878                                   | 1.171                       | 14.82                     | 0.0628862                         | 0.58                                       |
| Meat-based breakfast avg. | Meatless breakfast | 1.490                                   | 0.264                       | 8.30                      | 0.0000017                         | 4.92                                       |
| Beef-based lunch          | Meatless lunch     | 8.53                                    | 0.350                       | 26.17                     | 0.0683330                         | 31.18                                      |
| Pork-based lunch          | Meatless lunch     | 1.220                                   | 0.275                       | 14.16                     | 0.0683262                         | 1.87                                       |
| Chicken-based lunch       | Meatless lunch     | 0.529                                   | 0.112                       | 8.71                      | 0.0683258                         | 1.02                                       |
| Fish-based lunch          | Meatless lunch     | 1.514                                   | 2.124                       | 27.92                     | 0.0683277                         | 0.46                                       |
| Meat-based lunch average  | Meatless lunch     | 2.836                                   | 0.556                       | 15.49                     | 0.0000031                         | 8.97                                       |
| Beef-based dinner         | Meatless dinner    | 10.25                                   | 0.395                       | 31.57                     | 0.0834016                         | 37.83                                      |
| Pork-based dinner         | Meatless dinner    | 1.428                                   | 0.305                       | 17.08                     | 0.0833935                         | 2.45                                       |
| Chicken-based dinner      | Meatless dinner    | 0.592                                   | 0.108                       | 10.49                     | 0.0833930                         | 1.43                                       |
| Fish-based dinner         | Meatless dinner    | 1.781                                   | 2.537                       | 33.69                     | 0.0833952                         | 0.75                                       |
| Meat-based dinner average | Meatless dinner    | 3.669                                   | 0.801                       | 20.36                     | 0.0000040                         | 11.57                                      |

Figure S 1. Ranking of food items for the weight as consumed (averaged across meals) versus as produced in meat-containing meals.

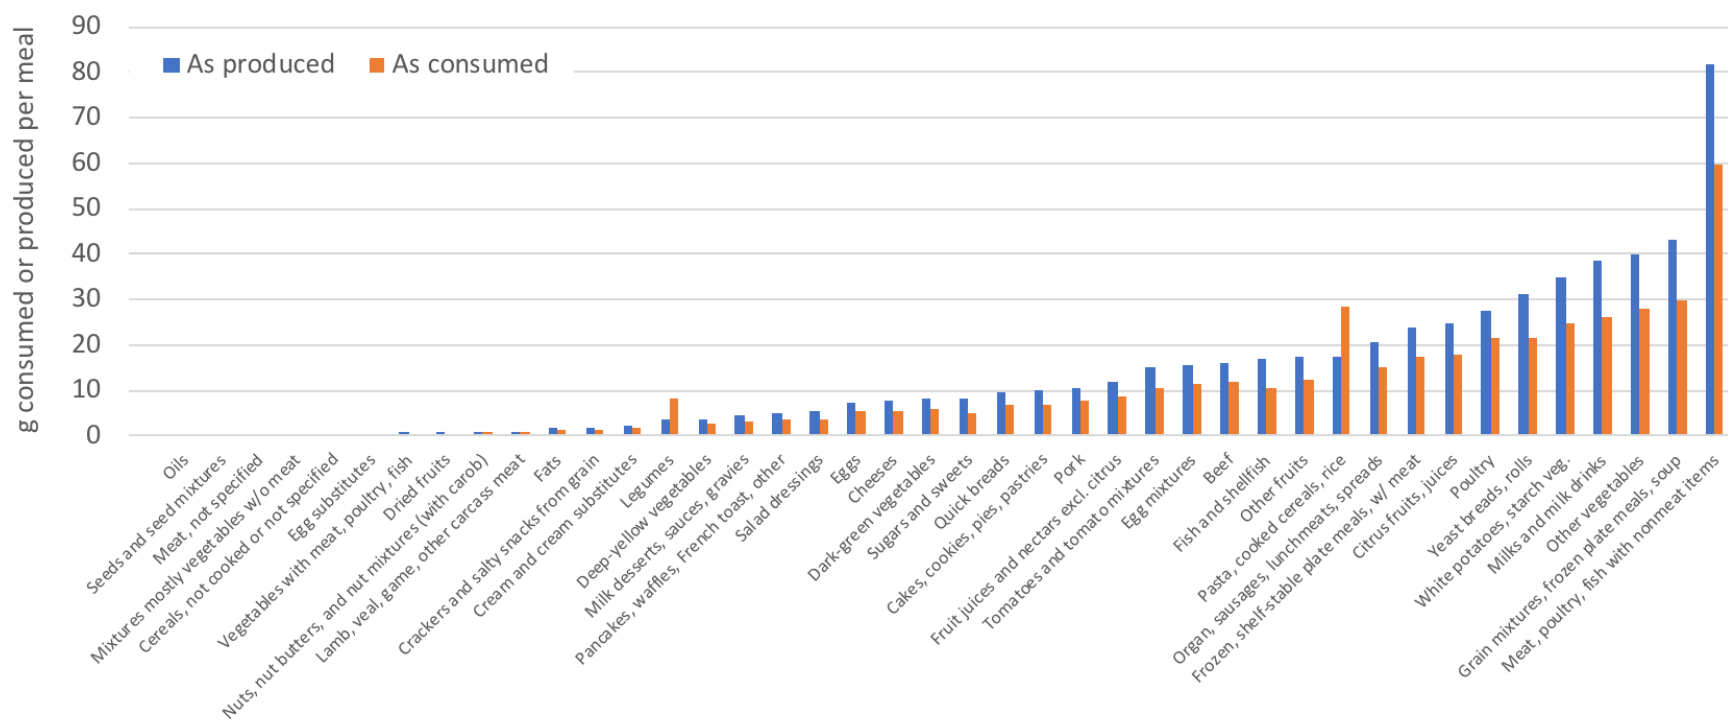

Figure S 2. Contribution of food categories to the environmental impact of lunches

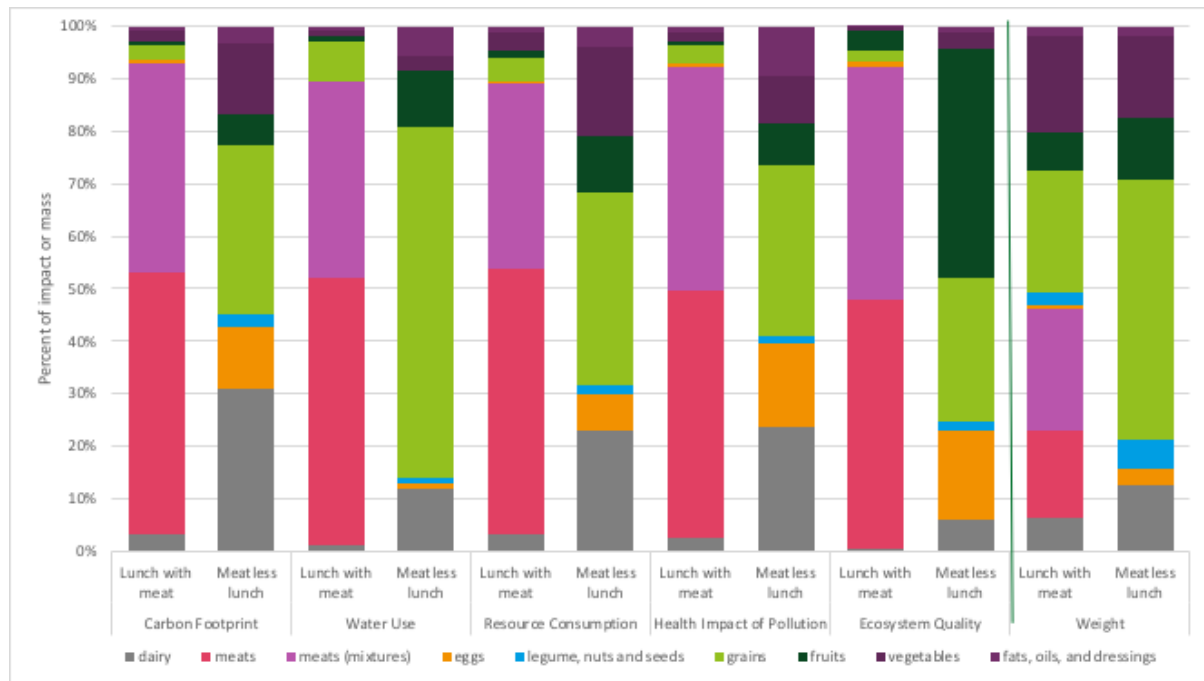

Figure S 3. Contribution of food categories to the environmental impact of dinners

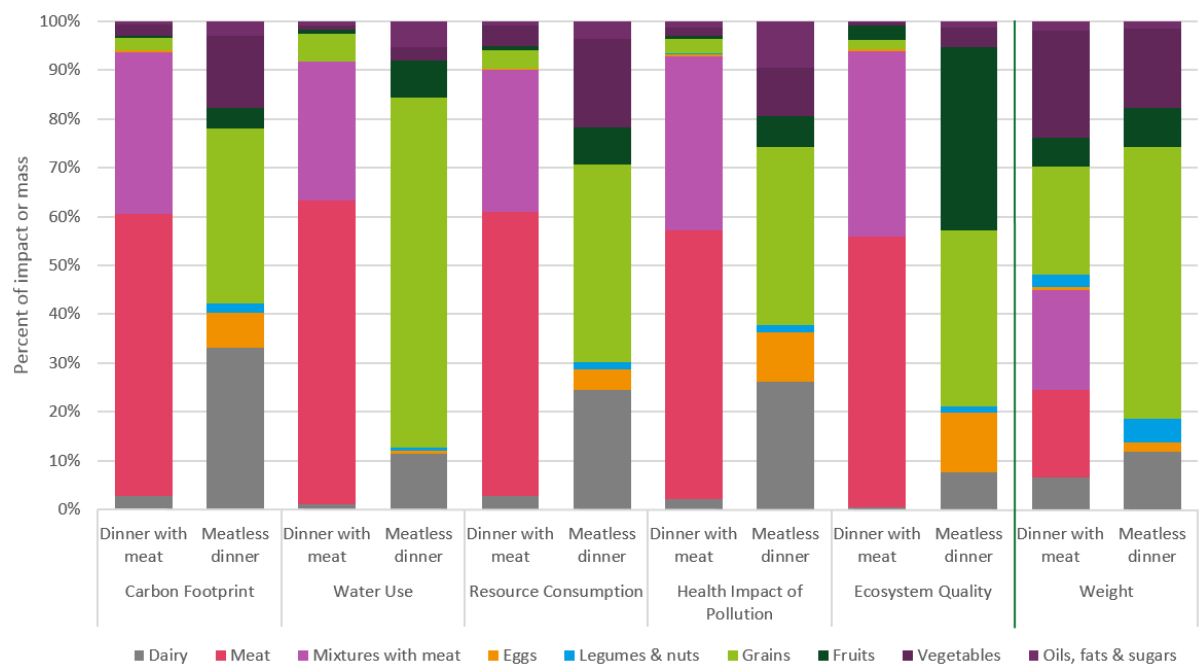

Supplement: s1 [file s1]
